# Supplementary material
Source: PubMed Central journal article supplement (PMC1805617)
Supplement: pnas_0611119104_1.pdf [file pnas_0611119104_1.pdf]

**Table 4. List of loci from the *TAS* gene prediction algorithm ( $P < 0.005$ ) using Col-0 MPSS small RNA data**

| Locus*    | Name <sup>†</sup> | <i>n</i> | <i>k</i> | <i>P</i> value | Small RNA sequence <sup>‡</sup> | Hits <sup>§</sup> | Predicted target <sup>  </sup>                                                                        |
|-----------|-------------------|----------|----------|----------------|---------------------------------|-------------------|-------------------------------------------------------------------------------------------------------|
| At1g50055 | TAS1b             | 14       | 8        | 1.10E-08       | UUCUAAGUCCAACAUAGCGUA           | 4                 | At1g51670 At4g29760<br>At4g29770 At5g18040<br>At5g18065                                               |
|           |                   |          |          |                | UUCUAAGUCCAACAUAGCAUA           | 4                 | At5g18040 At5g18065                                                                                   |
|           |                   |          |          |                | AACAAGCGAAUGAGUCAUUCA           | 1                 | At4g05420                                                                                             |
| At2g27400 | TAS1a             | 15       | 6        | 1.62E-05       | UUCUAAGUCCAACAUAGCGUA           | 4                 | At1g51670 At4g29760<br>At4g29770 At5g18040<br>At5g18065                                               |
|           |                   |          |          |                | UCCUAAGUCCAACAUAGCGUU           | 1                 | At5g18040 At5g18065                                                                                   |
| At1g63070 | PPR               | 21       | 6        | 1.48E-04       | UUCUCCAUCUUGUUGAGCAGA           | 3                 | At1g62590 At1g62910<br>At1g63070 At1g63080<br>At1g63150 At1g63330<br>At1g63400 At1g64580<br>At4g25180 |
|           |                   |          |          |                | UUGUGUUGAAAAAGCCCAUGA(siR3as)   | 2                 | At1g63070 At1g63080                                                                                   |
|           |                   |          |          |                | UUUAAAGCCAAAUCAGGUUCA           | 2                 | At1g62590 At1g62910<br>At1g63070 At1g63080                                                            |
|           |                   |          |          |                | ACAUCAGCCUCUAUUUUGCCU           | 4                 | At1g62910 At1g62930<br>At1g63070 At1g63080<br>At1g63130 At2g07360<br>At3g61780                        |
|           |                   |          |          |                | AGAUCUGGUUGACAACCUUUC           | 4                 | At1g62670 At1g62910<br>At1g62930 At1g63070<br>At1g63080 At1g63130<br>At1g63150 At5g23150              |
|           |                   |          |          |                | UUGUGUUGAAAAAGCCCAUGA(siR3as)   | 2                 | At1g62670 At1g62910<br>At1g62930 At1g63070                                                            |
| At1g63080 | PPR               | 21       | 6        | 1.48E-04       | AGAUCUGGUUGACAACCUUUC           | 4                 | At1g63080 At1g63130<br>At1g63150 At5g23150                                                            |
|           |                   |          |          |                | UUGUGUUGAAAAAGCCCAUGA(siR3as)   | 2                 | At1g63070 At1g63080                                                                                   |

|              |                                     |    |    |          |                              |                               |                                     |   |                              |
|--------------|-------------------------------------|----|----|----------|------------------------------|-------------------------------|-------------------------------------|---|------------------------------|
|              |                                     |    |    |          |                              |                               |                                     |   | <b>At1g62590 At1g62910</b>   |
|              |                                     |    |    |          |                              |                               |                                     |   | <b>At1g63070 At1g63080</b>   |
|              |                                     |    |    |          |                              |                               | <b>UUCUCCAUCUUGUUGAGCAGA</b>        | 3 | <b>At1g63150 At1g63330</b>   |
|              |                                     |    |    |          |                              |                               |                                     |   | <b>At1g63400 At1g64580</b>   |
|              |                                     |    |    |          |                              |                               |                                     |   | At4g25180                    |
|              |                                     |    |    |          |                              |                               | <b>UUUAAAGCCAAAUCAGGUUCA</b>        | 2 | <b>At1g62590 At1g62910</b>   |
|              |                                     |    |    |          |                              |                               |                                     |   | <b>At1g63070 At1g63080</b>   |
|              |                                     |    |    |          |                              |                               |                                     |   | <b>At1g62910 At1g62930</b>   |
|              |                                     |    |    |          |                              |                               | <b>ACAUCAGCCUCUAUUUUGCCU</b>        | 4 | <b>At1g63070 At1g63080</b>   |
|              |                                     |    |    |          |                              |                               |                                     |   | <b>At1g63130 At2g07360</b>   |
|              |                                     |    |    |          |                              |                               |                                     |   | At3g61780                    |
| At1g63130    | PPR                                 |    | 21 | 6        | 1.48E-04                     | <b>CACCAGGCUCUAUUUUGCCU</b>   |                                     | 1 | <b>At1g62670 At4g00950</b>   |
|              |                                     |    |    |          |                              |                               |                                     |   | <b>At1g62930 At1g63130</b>   |
|              |                                     |    |    |          |                              |                               | <b>UCAAAGCCAAAUCAUAUCAC(siR9as)</b> | 4 | <b>At1g63150 At1g63330</b>   |
|              |                                     |    |    |          |                              |                               |                                     |   | <b>At1g63400</b>             |
|              |                                     |    |    |          |                              |                               | <b>GGGAAAAUAGAGCCUGGUGUU</b>        | 1 | At3g17780                    |
|              |                                     |    |    |          |                              |                               |                                     |   | <b>At1g62910 At1g63070</b>   |
|              |                                     |    |    |          |                              |                               | <b>AAUCGGGCUGAUAUCCCAUUU</b>        | 1 | <b>At1g63080 At1g63130</b>   |
|              |                                     |    |    |          |                              |                               |                                     |   | At5g04250                    |
|              |                                     |    |    |          |                              |                               | <b>AGAGCUUCAGAAGCAGUGGCU</b>        | 1 | At5g15400                    |
|              |                                     |    |    |          |                              |                               |                                     |   | <b>At1g62910 At1g62930</b>   |
|              |                                     |    |    |          |                              |                               | <b>CCACUGCUUCUGAAGCUCUGU</b>        | 4 | <b>At1g63130 At1g63150</b>   |
| At2g39681    | TAS2                                |    | 9  | 4        | 3.49E-04                     | <b>GAUGGUAGUUCAAGUAUCCA</b>   |                                     | 1 | At2g39680                    |
|              |                                     |    |    |          |                              |                               |                                     |   | <b>GUAUCAUCAUUCGCUUGGAGA</b> |
|              |                                     |    |    |          |                              |                               |                                     |   | At5g60050                    |
|              |                                     |    |    |          |                              |                               |                                     |   | At1g51670 At4g29760          |
| At2g39675    | TAS1c                               |    | 17 | 5        | 5.18E-04                     | <b>UUCUAAGUCCAACAUAAGCGUA</b> |                                     | 4 | At4g29770 At5g18040          |
|              |                                     |    |    |          |                              |                               |                                     |   | At5g18065                    |
|              |                                     |    |    |          |                              |                               | <b>UUCUAAGUCCAACAUAUCGAC</b>        | 2 | At4g29770                    |
| Chr4:5560355 | IGR between At4g08692 and At4g08695 | 19 | 5  | 9.17E-04 | <b>GCUUCUUUUGGCUAACAGAGU</b> |                               |                                     | 1 | <b>At1g74850</b> At5g48340   |
| At4g08710    | Hypothetical protein                | 12 | 4  | 1.25E-03 | <b>AGUCUCCUUCGUUGCCGUCGC</b> |                               |                                     | 4 | At4g35985                    |
| Chr2:8111556 | IGR between At2g18690 and At2g18700 | 13 | 4  | 1.75E-03 | <b>UUUCUAACUUCGCCAGACUAC</b> |                               |                                     | 1 | At4g16890                    |
| Chr4:2559720 | IGR between At4g04990 and At4g05000 | 22 | 5  | 1.90E-03 | <b>GGUUUGCUUACUUGUUUCGAU</b> |                               |                                     | 1 | At2g26000                    |

|               |                                     |    |   |          |  |                               |   |                                            |
|---------------|-------------------------------------|----|---|----------|--|-------------------------------|---|--------------------------------------------|
|               |                                     |    |   |          |  | <b>GAAUAAUCAGUCUUUGC UUUA</b> | 4 | At3g18780                                  |
|               |                                     |    |   |          |  | <b>GUUCAGAAUCUCAUUCGAUAC</b>  | 1 | At1g10220 At2g46660<br>At4g34310 At5g55860 |
| Chr5:16033101 | IGR between At5g40000 and At5g40010 | 22 | 5 | 1.90E-03 |  | <b>UUUCCAUGC UAACUAUGAACG</b> | 1 | At4g32700                                  |
| Chr1:11839123 | IGR between At1g32720 and At1g32730 | 2  | 2 | 1.98E-03 |  | <b>GUUCCAUCGUGUUUCUAAAC</b>   | 2 | At1g33170                                  |
| At1g44930     | Hypothetical protein                | 2  | 2 | 1.98E-03 |  | <b>UCCGCCGCCAGUUGCAACAG</b>   | 1 | At1g35110 At1g44930<br>At1g71840           |
| Chr1:24277774 | IGR between At1g65345 and At1g65347 | 2  | 2 | 1.98E-03 |  | <b>ACCCAGUUCAGUGAGACGCUC</b>  | 4 | At2g07705                                  |
|               |                                     |    |   |          |  | <b>ACGAUCUAAGUAAGGAGGUAG</b>  | 3 | At2g07705 At3g55270                        |
| At2g07705     | Hypothetical protein                | 2  | 2 | 1.98E-03 |  | <b>ACCCAGUUCAGUGAGACGCUC</b>  | 4 | At2g07705                                  |
|               |                                     |    |   |          |  | <b>ACGAUCUAAGUAAGGAGGUAG</b>  | 3 | At2g07705 At3g55270                        |
| At3g13370     | Hypothetical protein                | 2  | 2 | 1.98E-03 |  | <b>GGUCCACUUUAUAACCUCCG</b>   | 4 | At3g13370                                  |
| Chr3:9418974  | IGR between At3g25790 and At3g25800 | 2  | 2 | 1.98E-03 |  | <b>UGAAGGAUCGAGGUCGAGGCA</b>  | 2 | At1g56650 At1g66370<br>At1g66390           |
| Chr3:9577407  | IGR between At3g26170 and At3g26180 | 2  | 2 | 1.98E-03 |  | <b>UGUGGUUGGUCCUGGGUUUCC</b>  | 1 | At1g27980                                  |
| At3g31900     | Hypothetical protein                | 2  | 2 | 1.98E-03 |  |                               |   |                                            |
| At4g01980     | Hypothetical protein                | 2  | 2 | 1.98E-03 |  | <b>CACGGGGUCUUUGC UAUGUU</b>  | 2 | At2g22710 At5g28890<br>At1g37080 At2g22710 |
|               |                                     |    |   |          |  | <b>AGCUUUUUGCUCAUUUCGGAC</b>  | 4 | At2g38940 At4g35540<br>At5g28890 At5g45230 |
|               |                                     |    |   |          |  | <b>CAUCUUUGCCCAUCUUUGCUU</b>  | 2 | At2g22710 At3g27240<br>At5g28890 At5g40810 |
| At4g03760     | Hypothetical protein                | 2  | 2 | 1.98E-03 |  | <b>AAUUGAGUUCGGUGGUCCGGA</b>  | 2 | At1g40133                                  |
| Chr5:14644470 | IGR between At5g37010 and At5g37020 | 2  | 2 | 1.98E-03 |  | <b>AAUUGUCCGUGUUAGAAUUGU</b>  | 1 | At3g21450                                  |
| At3g29033     | Glycine-rich protein                | 23 | 5 | 2.35E-03 |  | <b>UCUCCGAGUACCGCCGUCCAC</b>  | 1 | At1g44085                                  |
|               |                                     |    |   |          |  | <b>GGACUGUAACCAUCUGGAUUC</b>  | 1 | At1g44085                                  |
| Chr2:689346   | IGR between At2g02550 and At2g02560 | 7  | 3 | 2.55E-03 |  | <b>CUGACUACCCCGGCAUUAG</b>    | 6 | At5g45030                                  |
| Chr2:6982074  | IGR between At2g16030 and At2g16040 | 7  | 3 | 2.55E-03 |  | <b>AGAGUUUUGGUAACAAUCAAC</b>  | 1 | At1g77830                                  |
| Chr2:8829532  | IGR between At2g20460 and At2g20465 | 24 | 5 | 2.88E-03 |  |                               |   |                                            |
| At3g42550     | Aspartyl protease family protein    | 15 | 4 | 3.15E-03 |  | <b>CUGCUCGGCAUGGAAGGUUGU</b>  | 2 | At1g50200                                  |
|               |                                     |    |   |          |  | <b>CGAGCCAUGAACUCGACCUCA</b>  | 2 | <b>At5g52850</b>                           |
|               |                                     |    |   |          |  | <b>AGAACCGUCGCCUCGUAGCCG</b>  | 2 | At3g42550                                  |

|              |                                     |    |   |          |                                                                                                                                                                                            |                            |                                                                                                |
|--------------|-------------------------------------|----|---|----------|--------------------------------------------------------------------------------------------------------------------------------------------------------------------------------------------|----------------------------|------------------------------------------------------------------------------------------------|
| Chr4:2346821 | IGR between At4g04630 and At4g04635 | 15 | 4 | 3.15E-03 | <b>AGAUACAACCGCACAGAUUGC</b><br><b>AGAUAGCGGUGUACAGACAAC</b><br><b>AGAUUACGCUGUACAGAUUGU</b>                                                                                               | 4<br>3<br>1                | At4g21480<br>At2g47980<br>At5g61970                                                            |
| Chr2:641230  | IGR between At2g02440 and At2g02450 | 8  | 3 | 3.95E-03 |                                                                                                                                                                                            |                            |                                                                                                |
| Chr4:728380  | IGR between At4g01680 and At4g01690 | 8  | 3 | 3.95E-03 |                                                                                                                                                                                            |                            |                                                                                                |
| Chr5:5217351 | IGR between At5g15980 and At5g15990 | 8  | 3 | 3.95E-03 |                                                                                                                                                                                            |                            |                                                                                                |
| At3g06435    | Expressed protein                   | 64 | 8 | 4.16E-03 | <b>CAACGUCUACAAAAAGUUC</b><br><b>AGUUCUCUCGUCAAUGGACAA</b><br><b>AAGGAAUGCUUCUGAUUCAUU</b><br><b>AACUUUUUUGUAGACGUUGAC</b><br><b>CCUAUGAUACUCAUUUUCGAC</b><br><b>UUGAGGUCCCUACUGAAUUGU</b> | 2<br>2<br>2<br>2<br>2<br>2 | At3g06435<br>At3g06435 At5g67130<br>At4g25570<br>At5g65810<br>At3g06435<br>At1g36920 At3g06435 |
| Chr2:4114132 | IGR between At2g10555 and At2g10560 | 26 | 5 | 4.20E-03 | <b>GGAAAUCAGGUUUAGUGAUG</b><br><b>CUCAAGACAAAAGCAGACGCA</b><br><b>UGAGACUCGGGCUCAUAUUGU</b><br><b>UCACUAAACCUGAUUUUCCAC</b>                                                                | 2<br>2<br>1<br>2           | At4g37880<br>At4g37210<br>At5g49820<br>At1g71870                                               |
| At3g44580    | Hypothetical protein                | 26 | 5 | 4.20E-03 | <b>AGAAGUUCUUGCAGCGUUGUU</b><br><b>GAU AACAGGACGCUUGUAGG</b><br><b>UGGCCUCACAUCAAUAUGCUU</b><br><b>CAAAGCUGCCAGUAGCUUUGU</b>                                                               | 1<br>1<br>2<br>2           | At3g10690 At3g11070<br>At5g55070<br>At3g44580<br>At2g14000<br>At2g14000 At3g44580              |

\*The locus name or the first base position of the small RNA cluster

†Gene annotation or intergenic region (IGR)

‡Phased small RNAs listed are either inferred from the coordinates of 17-nt MPSS signatures (bolded) or validated by Northern blot analyses (this study). Only the ones with predicted target genes were shown. TAS2-derived ta-siR2140 is not represented in Col-0 MPSS database thus is not included in the current list.

§The number of genomic hits for each corresponding 17-nt MPSS signature

¶miRU was used for predicting small RNA target genes (score  $\leq 2$ , G:U  $\leq 4$ , indels  $\leq 1$ , other mismatches  $\leq 2$ ). PPR genes are in bold.
